# Supplementary material for: First Longitudinal Analysis of the Immunological Mechanism at Play in Uterus Transplantation
Source: PubMed Central journal article supplement — Transplant Direct. 2024 Nov 15;10(12):e1729. doi: 10.1097/TXD.0000000000001729 (PMC11576045; doi:10.1097/txd.0000000000001729), 2024-11-15

**Table S1.** Imaging mass cytometry panel

| Short name (gene)  | Clone        | source     | Isotope | Dilution | Conditions |
|--------------------|--------------|------------|---------|----------|------------|
| alpha-SMA          | IA4          | STBT       | 141Nd   | 1/400    | 4°         |
| Collagen Type I    | ABT123       | Merck      | 143Nd   | 1/100    | 4°         |
| CD14               | EPR3653      | STBT       | 144Nd   | 1/100    | 4°         |
| pankeratin         | C11          | STBT       | 148Nd   | 1/100    | 4°         |
| CD15               | W6D3         | STBT       | 149Sm   | 1/50     | 4°         |
| CD107A             | H4A3         | STBT       | 151Eu   | 1/50     | 4°         |
| CD45(PTPRC)        | D9M81        | STBT       | 152Sm   | 1/200    | 4°         |
| CD11c (ITGAX)      | EP134Y       | Abcam      | 154Sm   | 1/200    | 4°         |
| CD4                | EPR6855      | STBT       | 156Gd   | 1/100    | 4°         |
| E-Cadherin         | 24-E10       | STBT       | 158Gd   | 1/200    | 4°         |
| CD68               | KP1          | STBT       | 159Tb   | 1/800    | 4°         |
| CD20 (MS4A1)       | H1           | STBT       | 161Dy   | 1/400    | 4°         |
| CD8a               | C8/144B      | STBT       | 162Dy   | 1/200    | 4°         |
| VEGF               | G 153-694    | STBT       | 163Dy   | 1/100    | 4°         |
| Granzyme B         | EPR20129-21  | STBT       | 167Er   | 1/200    | 4°         |
| CD45RA(PTPRC)      | HI100        | STBT       | 169Er   | 1/200    | 4°         |
| CD3                | Polyclonal   | STBT       | 170Er   | 1/100    | 4°         |
| CD16 (FCGR3A)      | EPR16784     | Abcam      | 172Yb   | 1/200    | 4°         |
| HLADR              | LN3          | STBT       | 174Yb   | 1/1600   | 4°         |
| CD56               | E7X9M rabbit | Ozyme      | 155Gd   | 1/100    | 4°         |
| HLAG               | MEM-G/2      | Invitrgen  | 145Nd   | 1/100    | 4°         |
| DC SIGN            | NBP1-77284   | BioTechne  | 166Er   | 1/100    | 4°         |
| CD69               | EPR21814     | Abcam      | 165Ho   | 1/50     | 4°         |
| Integrin $\beta$ 7 | FIB504       | Invitrogen | 176Yb   | 1/100    | 4°         |
| ACE2               | A200691      | Biologend  | 175Yb   | janv-50  | 4°         |
| Iridium            | 201192A      | STBT       | 191Ir   | 1/400    | 4°         |
| CD27               | EPR8569      | STBT       | 171Yb   | 1/50     | 1h30 RT    |

**Table S2:** Imaging mass cytometry density of the cells (number/mm<sup>2</sup>) according the biopsies

|              | Cervical biopsy Control | Cervical biopsy UTx 30 months | Cervical biopsy UTx explantation | Uterine fundus Biopsy UTx explantation |
|--------------|-------------------------|-------------------------------|----------------------------------|----------------------------------------|
| Bcells       | 0                       | 5                             | 106                              | 2                                      |
| Endothelials | 1243                    | 1904                          | 928                              | 660                                    |
| Epithelials  | 1856                    | 929                           | 563                              | 131                                    |
| LT4          | 211                     | 184                           | 299                              | 49                                     |
| LT8          | 284                     | 128                           | 429                              | 77                                     |
| Macro        | 75                      | 161                           | 667                              | 18                                     |
| Mono         | 10                      | 31                            | 313                              | 2                                      |
| undefined    | 381                     | 321                           | 708                              | 55                                     |
| Total cells  | 3662                    | 2111                          | 3778                             | 1292                                   |

**Table S3.** List of flow cytometry markers in blood samples

| Marker          | Clone    | Fluorochrom          | Company         |
|-----------------|----------|----------------------|-----------------|
| <b>NK Cells</b> |          |                      |                 |
| CD3             | UCHT1    | eFluor780            | eBioscience     |
| CD16            | REA423   | PerCP-Vio 700        | Miltenyi Biotec |
| CD56            | REA196   | PEVio770             | Miltenyi Biotec |
| CD161           | DX12     | FITC                 | BD Pharmingen   |
| CD69            | TP1.55.3 | ECD                  | Coulter         |
| HLA-DR          | I243     | AlexaFluor 700       | BioLegend       |
| CD57            | NC1      | Pacific Blue         | Coulter         |
| NKG2A           | Z199     | Phycoerythrin        | Coulter         |
| NKG2C           | #134591  | Allophycocyanin      | R&D System      |
| NKG2D           | 1D11     | Brilliant Violet 786 | BD Optibuild    |
| NKp30           | P30-15   | Brilliant Violet 421 | BD Pharmingen   |
| NKp46           | REA808   | PEVio615             | Miltenyi Biotec |
| KIR2DL1         | HP-3E4   | FITC                 | BD Pharmingen   |
| KIR2DL2/DL3     | GL183    | Phycoerythrin        | Coulter         |
| KIR3DL1         | DX9      | AlexaFluor-700       | Biolegend       |
| ILT2            | GHI/75   | Allophycocyanin      | Miltenyi Biotec |
| DNAM-1          | DX11     | Brilliant Violet 650 | BD Optibuild    |
| CD107a          | H4A3     | FITC                 | BD Pharmingen   |
| IFN- $\gamma$   | B27      | AlexaFluor-700       | BD Pharmingen   |
| TNF- $\alpha$   | Mab11    | eFluor450            | eBioscience     |
| Viability       |          | eFluor506            | eBioscience     |
| <b>T Cells</b>  |          |                      |                 |
| CD45-RA         | 5H9      | FITC                 | BD Pharmingen   |
| CD38            | HB7      | PE                   | BD Pharmingen   |
| CD8             | B9.11    | ECD                  | Beckman         |
| CD27            | L128     | PerCP-Cy 5.5         | BD Pharmingen   |
| CCR7 (CD197)    | 3D12     | PE-Cy 7              | BD Pharmingen   |
| CD45-RA         | RPA-T4   | APC                  | BD Pharmingen   |
| HLA-DR          | I243     | AF700                | BioLegend       |
| CD3             | UCHT1    | eFluor780            | eBioscience     |
| CD57            | NC1      | Pacific Blue         | Beckman         |
| Viability       |          | eF506                | eBioscience     |
| <b>B Cells</b>  |          |                      |                 |
| IgD             | IA6-2    | FITC                 | BD Pharmingen   |
| CD11c           | 3.9      | PE                   | BD Pharmingen   |
| CD3             | UCHT1    | PE-CF594             | BD Pharmingen   |
| CD14            | MoP9     | PE-CF594             | BD Pharmingen   |
| CD38            | HIT2     | PerCP-Cy 5.5         | BD Pharmingen   |
| CD27            | M-T271   | PE-Cy 7              | BD Pharmingen   |
| CD21            | B-ly4    | APC                  | BD Pharmingen   |
| CD19            | HIB19    | AR700                | BD Pharmingen   |
| IgM             | G20-127  | BV510                | BD Pharmingen   |
| CD24            | ML5      | BV650                | BD Pharmingen   |
| Viability       |          | eF780                | eBioscience     |

Suppl. Fig. 1: Micrographs showing negative c4d staining in two representative cervical biopsy taken from the UTx recipient. A: 14 days after UTx; B: 8 months after UTx (showing borderline lesions)

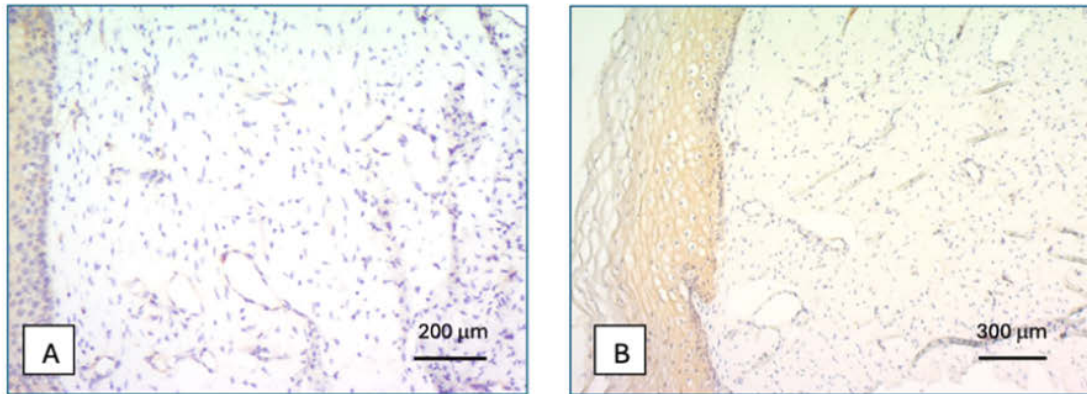

Supplement: txd-10-e1729-s001.pdf [file txd-10-e1729-s001.pdf]
